# Supplementary material for: Assessment of Appetitive Behavior in Honey Bee Dance Followers
Source: PubMed Central journal article supplement (PMC5934941; doi:10.3389/fnbeh.2018.00074), 2018-04-27
Supplement: Data_Sheet_1.pdf [file Data_Sheet_1.pdf]

## Supplementary Material

### Assessment of appetitive behavior in honey bee dance followers

Mariel A. Moauro<sup>†</sup>, M. Sol Balbuena<sup>†</sup>, Walter M. Farina<sup>\*¶</sup>

<sup>†</sup> These authors have contributed equally to this work.

\* Corresponding author: e-mail: walter@fbmc.fcen.uba.ar

**Table S1.** Set of generalized linear models that can explain variability in the honey bees' spontaneous odor response

| Hive  | Model               | AICc  | $\Delta_i$ | $w_i$     | <i>MMI</i>        |            |            |
|-------|---------------------|-------|------------|-----------|-------------------|------------|------------|
| H1+H2 | SOR ~ 1             | 349.9 | 0.00       | 0.367     |                   |            |            |
|       | SOR ~ Hive          | 350.5 | 0.52       | 0.282     | Hive              | CI2.5%     | CI97.5%    |
|       | SOR ~ Behavior      | 351.2 | 1.27       | 0.194     | H1+H2 (Intercept) | -1.9411480 | -1.1060866 |
|       | SOR ~ Hive+Behavior | 351.6 | 1.70       | 0.157     | Hive2             | -0.1964185 | 2.012371   |
|       |                     |       |            | Followers | -0.2916715        | 0.7745214  |            |

*AICc* is a second-order AIC, necessary for small samples.  $\Delta_i$  is AIC differences, relative to the smallest AIC value in the set of R models. Formally,  $\Delta_i = AIC_i - AIC_{\min}$  is an estimation of distance between the best model and the *i*th model. Akaike weights, denoted by  $w_i$ , are the relative likelihood of the model. There are normalized to sum to 1 and interpreted as probabilities. None of the models reached a weight of 0.8, so we applied a *multimodel inference* (MMI), to predict the levels significance. All confidence intervals (CI) include 0, so none of the factors resulted to be significant to construct the minimal model.

**Table S2.** Set of generalized linear models that could explain the variability in the honey bees' gustatory response score

| Hive          | Model               | AICc       | $\Delta_i$ | $w_i$ |            |
|---------------|---------------------|------------|------------|-------|------------|
| H1+H2         | GRS ~ Behavior+Hive | 1369.9     | 0.00       | 0.788 | <i>MMI</i> |
|               | GRS ~ Behavior      | 1372.5     | 2.62       | 0.212 |            |
|               | GRS ~ Hive          | 1388.2     | 18.29      | 0.000 |            |
|               | GRS ~ 1             | 1390.0     | 20.09      | 0.000 |            |
| <i>MMI</i>    |                     |            |            |       |            |
| Hive          |                     | CI2.5%     | CI97.5%    |       |            |
| H1+H2         | (Intercept)         | 1.01144619 | 1.2292821  |       |            |
|               | Hive2               | 0.01075785 | 0.2299772  |       |            |
|               | Followers           | 0.14079860 | 0.3628541  |       |            |
| <i>SUBSET</i> |                     |            |            |       |            |
| Hive          | Model               | AICc       | $\Delta_i$ | $w_i$ |            |
| H1            | GRS ~ Behavior      | 751        | 0.00       | 0.885 |            |
|               | GRS ~ 1             | 755        | 4.08       | 0.115 |            |
| H2            | GRS ~ Behavior      | 619.8      | 0.00       | 0.999 |            |
|               | GRS ~ 1             | 633.2      | 13.32      | 0.001 |            |

*AICc* is a second-order AIC, necessary for small samples.  $\Delta_i$  is AICc differences, relative to the smallest AIC value in the set of R models. Formally,  $\Delta_i = AIC_i - AIC_{\min}$  is an estimation of distance between the best model and the *i*th model. Akaike weights, denoted by  $w_i$ , are the relative likelihood of the model. There are normalized to sum to 1 and interpreted as probabilities. None of the models reached a weight of 0.8, so we applied a *multimodel inference* (MMI) to predict the levels significance. The confidence intervals (CI) that did not include 0 correspond to the *hive* and *behavior* factors. As there was significant difference between hives, we decided to construct a data subset of each hive to evaluate *behavior* factor.

**Table S3.** Set of generalized linear models that could explain the variability in the honey bees' acquisition during differential conditioning

| Hive  | Model                           | AICc  | $\Delta_i$ | $w_i$ |
|-------|---------------------------------|-------|------------|-------|
| H3+H4 | ACQ ~ Behavior+Trial+1 bee      | 690.6 | 0.00       | 0.371 |
|       | ACQ ~ Trial+1 bee               | 690.7 | 0.12       | 0.350 |
|       | ACQ ~ Behavior+Trial+Hive+1 bee | 692.5 | 1.89       | 0.144 |
|       | ACQ ~ Trial+Hive+1 bee          | 692.6 | 2.02       | 0.135 |
|       | ACQ ~ Behavior+1 bee            | 769.3 | 78.71      | 0.000 |
|       | ACQ ~ 1 bee                     | 769.5 | 78.91      | 0.000 |
|       | ACQ ~ Behavior+Hive+1 bee       | 771.2 | 80.59      | 0.000 |
|       | ACQ ~ Hive+1 bee                | 771.4 | 80.79      | 0.000 |

  

| <i>MMI</i>        |             |             |
|-------------------|-------------|-------------|
| Hive              | CI2.5%      | CI97.5%     |
| H3+H4 (Intercept) | -2.66846560 | -0.90798960 |
| Trial3            | 1.21580930  | 2.63320780  |
| Trial4            | 1.70324160  | 3.19582560  |
| Trial5            | 2.20978350  | 3.80418340  |
| Followers         | -0.24850660 | 1.70056700  |
| Hive4             | -0.81230430 | 1.20408530  |

*AICc* is a second-order AIC, necessary for small samples.  $\Delta_i$  is AICc differences, relative to the smallest AIC value in the set of R models. Formally,  $\Delta_i = AIC_i - AIC_{\min}$  is an estimation of distance between the best model and the *i*th model. Akaike weights, denoted by  $w_i$ , are the relative likelihood of the model. There are normalized to sum to 1 and interpreted as probabilities. None of the models reached a weight of 0.8, so we applied a *multimodel inference* (MMI) to predict the levels significance. The confidence intervals (CI) that did not include 0 correspond to the *trial* factor. There is significant difference between all of its levels.

**Table S4.** Set of generalized linear models that could explain the variability in the honey bees' odor response after differential conditioning

| Hive  | Model                | AICc  | $\Delta_i$ | weight | <i>MMI</i> |             |                        |
|-------|----------------------|-------|------------|--------|------------|-------------|------------------------|
| H3+H4 | TEST ~ Behavior      | 197.4 | 0.00       | 0.613  | Hive       | CI2.5%      | CI97.5%                |
|       | TEST ~ Behavior+Hive | 198.6 | 1.24       | 0.330  | H3+H4      | (Intercept) | -0.17690320 0.87520660 |
|       | TEST ~ 1             | 203.0 | 5.66       | 0.036  |            | Followers   | 0.26200110 1.65058500  |
|       | TEST ~ Hive          | 204.2 | 6.82       | 0.020  |            | Hive4       | -1.02702480 0.37491670 |

*AICc* is a second-order AIC, necessary for small samples.  $\Delta_i$  is AICc differences, relative to the smallest AICc value in the set of R models. Formally,  $\Delta_i = AIC_i - AIC_{\min}$  is an estimation of distance between the best model and the *i*th model. Akaike weights, denoted by  $w_i$ , are the relative likelihood of the model. There are normalized to sum to 1 and interpreted as probabilities. None of the models reached a weight of 0.8, so we applied a *multimodel inference* (MMI) to predict the levels significance. The only confidence interval (CI) that did not include 0 corresponds to the *behavior* factor. It means that there is significant difference between its levels (follower, non-follower).
